# Supplementary material
Source: publisher site journal article supplement (https://www.dovepress.com/article/305248)
Supplement: Supplementary file 1 [file get_supplementary_file.php]

| Gene | Drug | Query Score | Interaction Score | PMIDs |
| --- | --- | --- | --- | --- |
| KRAS | VANDETANIB | 24.06 | 1.15 |  |
| KRAS | EVEROLIMUS | 13.87 | 0.66 | 23629727|20664174|20664172|26725216|22662154 |
| KRAS | PANITUMUMAB | 4.75 | 0.23 | 26812186|22537608|19075190|19255327|26644315|26162609|25183481|28404754|23071293|22734028|23182985|21228335|17384584|26540314|23324806|23404247|23625191|26623049|2278970|19114683|24919569|21398618|20921465|18316791|19679400|18794081|21975775|16361624|28275037|16618717|19773371|26371285|24558511|27897268|26341920|3122217|16434492|19018267|20921462|25210463|25157968|26438111|12460918|19223544|20978259|23090619|22407852|24727325|22392911|23406027|19064407 |
| KRAS | IXABEPILONE | 4.36 | 0.42 | 26864210 |
| KRAS | COPANLISIB | 3.87 | 0.19 | 24170767 |
| KRAS | PALBOCICLIB | 3.73 | 0.18 | 1291017|26658964|26369631|27167191 |
| KRAS | VEMURAFENIB | 3.21 | 0.1 | 27312529 |
| KRAS | PEMETREXED | 2.8 | 0.13 | 27876675 |
| KRAS | CARBOPLATIN | 2.61 | 0.25 | 25637314|16043828|22139083|26307133|21216929|27998224 |
| KRAS | ROMIDEPSIN | 2.61 | 0.25 |  |
| KRAS | COBIMETINIB | 2.18 | 0.21 | 22084396|23934108 |
| KRAS | LAPATINIB | 2.18 | 0.21 | 27108243 |
| KRAS | TRAMETINIB | 2.18 | 0.1 | 26343583|27659046|26644315|25665005|24685132|26324075|26882569|26582713|27338794|22169769|24915778|27222538|27556948|22805291|27312529|27876675|26369631|28179366 |
| KRAS | CABOZANTINIB | 2.14 | 0.1 | 27525386 |
| KRAS | CETUXIMAB | 1.74 | 0.08 | 26812186|22537608|26715098|19075190|19255327|26162609|25183481|19603018|23071293|26666244|22734028|23182985|25673644|21228335|17384584|23324806|25714871|23404247|26623049|26341921|2278970|19114683|22586653|22722830|25666295|21398618|18946061|27458141|20921465|18316791|19679400|18794081|21975775|28280091|16361624|28275037|16618717|19773371|26371285|24558511|25838391|20956938|27897268|19603024|3122217|24304820|16434492|22246397|19018267|20921462|18202412|28632865|25210463|25157968|20619739|26438111|12460918|27312529|19223544|20978259|23090619|21575616|22407852|20570890|27002107|28179366|24727325|22392911|23406027|25605843|19064407 |
| KRAS | PEMBROLIZUMAB | 1.65 | 0.08 | 28039262|28451792 |
| KRAS | BINIMETINIB | 1.58 | 0.08 | 32822286|26206338|28152546|25167228|27556948|27422710|27167191 |
| KRAS | NIVOLUMAB | 1.56 | 0.15 | 28525386 |
| KRAS | AFATINIB | 1.45 | 0.14 | 26341921|24685132|27338794|25870145 |
| KRAS | NECITUMUMAB | 1.32 | 0.06 | 26766738 |
| KRAS | OSIMERTINIB | 1.27 | 0.06 | 25870145|27252416 |
| KRAS | ALPELISIB | 1.19 | 0.11 | 27659046|27602501|24608574|27312529 |
| KRAS | LENALIDOMIDE | 1.17 | 0.06 | 27458141 |
| KRAS | CISPLATIN | 1.16 | 0.06 | 27040853|25081901|28652249 |
| KRAS | BORTEZOMIB | 1.15 | 0.06 | 22541434 |
| KRAS | ABEMACICLIB | 1.14 | 0.05 | 1291017|27217383|26658964 |
| KRAS | IRINOTECAN | 1.02 | 0.1 | 25567130|24042735|23209031|16707468|25714871|26341920|20619739|21325073|21575616|24798549|25322874 |
| KRAS | BEVACIZUMAB | 1.01 | 0.1 | 28632865|21216929|23828442|25363205 |
| KRAS | TEMSIROLIMUS | 0.93 | 0.09 | 21216929|26725216|27016228 |
| KRAS | SIROLIMUS | 0.92 | 0.04 | 26144316|26882569 |
| KRAS | GEFITINIB | 0.88 | 0.04 | 21258250|15696205|19794967|27338794|25870145|23313110 |
| KRAS | OXALIPLATIN | 0.87 | 0.04 | 26540314|20921465|26341920|23209813|21468686 |
| KRAS | NILOTINIB | 0.87 | 0.03 | 26725216 |
| KRAS | OLAPARIB | 0.87 | 0.04 | 28363999 |
| KRAS | ERLOTINIB | 0.74 | 0.07 | 21258250|27659046|15696205|19794967|18626007|16043828|23313110|27480147|21969500|21862683 |
| KRAS | MIDOSTAURIN | 0.74 | 0.04 | 26725216 |
| KRAS | PACLITAXEL | 0.73 | 0.07 | 16043828|22139083|26307133|21216929 |
| KRAS | ATEZOLIZUMAB | 0.67 | 0.06 | 28525386 |
| KRAS | PANOBINOSTAT | 0.67 | 0.06 | 22693356|19490892|26725216 |
| KRAS | FLUOROURACIL | 0.65 | 0.06 | 20921465|26341920 |
| KRAS | GEMCITABINE | 0.61 | 0.03 | 26540314|27167172|26156229|24915778|26091808|27975152|26228206|21862683 |
| KRAS | VENETOCLAX | 0.58 | 0.06 | 27974663 |
| KRAS | RAMUCIRUMAB | 0.58 | 0.02 | 25877855 |
| KRAS | DECITABINE | 0.54 | 0.05 | 25968887 |
| KRAS | CRIZOTINIB | 0.54 | 0.05 | 27338794|25232318|26432108 |
| KRAS | PONATINIB | 0.54 | 0.05 | 27338794 |
| KRAS | PAZOPANIB | 0.52 | 0.03 | 26324075 |
| KRAS | DABRAFENIB | 0.48 | 0.05 | 27312529 |
| KRAS | REGORAFENIB | 0.47 | 0.04 | 21170960|23629727|25838391|27004155 |
| KRAS | NERATINIB | 0.46 | 0.02 | 26725216|26243863 |
| KRAS | IMATINIB | 0.44 | 0.04 |  |
| KRAS | SUNITINIB | 0.43 | 0.01 | 26864210|23455880 |
| KRAS | ENCORAFENIB | 0.41 | 0.04 | 25673644|27312529 |
| KRAS | SORAFENIB | 0.34 | 0.03 | 23629727|26743856|23224737|26307133|25294897|27480147|25363205 |
| KRAS | ERDAFITINIB | 0.33 | 0.02 | 28341788 |
| KRAS | TRASTUZUMAB | 0.31 | 0.03 | 27108243|26243863 |
| KRAS | DASATINIB | 0.24 | 0.01 | 26855149|27231123|28280091|27222538|20956938|26725216 |
| KRAS | CAPECITABINE | 0.22 | 0.02 |  |
| KRAS | DOCETAXEL | 0.19 | 0.01 | 23200175|27876675|26125448|28492898 |
| KRAS | METFORMIN | 0.16 | 0.01 | 24077915|32444490|23877793 |
| KRAS | LEUCOVORIN | 0.06 | 0.01 | 20921465 |
| FLT4 | VANDETANIB | 5.08 | 0.73 |  |
| FLT4 | AXITINIB | 2.9 | 0.14 | 18541897 |
| FLT4 | TIVOZANIB | 2.84 | 0.2 |  |
| FLT4 | PAZOPANIB HYDROCHLORIDE | 2.49 | 0.36 |  |
| FLT4 | SUNITINIB MALATE | 1.87 | 0.27 |  |
| FLT4 | GEFITINIB | 1.58 | 0.23 |  |
| FLT4 | NINTEDANIB | 1.56 | 0.11 | 18559524|31016670 |
| FLT4 | ERLOTINIB | 1.45 | 0.21 |  |
| FLT4 | RABEPRAZOLE SODIUM | 1.33 | 0.1 |  |
| FLT4 | SORAFENIB TOSYLATE | 0.79 | 0.06 |  |
| FLT4 | LENVATINIB | 0.51 | 0.07 | 17943726 |
| FLT4 | PAZOPANIB | 0.48 | 0.07 | 27160228|28377484|17288876 |
| FLT4 | FOSTAMATINIB | 0.48 | 0.07 | 26516587 |
| FLT4 | REGORAFENIB | 0.4 | 0.06 |  |
| FLT4 | LENVATINIB MESYLATE | 0.27 | 0.04 |  |
| FLT4 | SUNITINIB | 0.25 | 0.01 | 15688612|17605814|17296815|22015057|19248971|17367763|16685460 |
| FLT4 | SORAFENIB | 0.13 | 0.01 | 16133532|16729906|17296815|16474853|16757355|28362716 |
| FLT4 | NINTEDANIB ESYLATE | 0.03 | 0 |  |
| TP53 | IBRUTINIB | 2.18 | 0.07 | 26563132 |
| TP53 | FURAZOLIDONE | 2.18 | 0.07 |  |
| TP53 | CHLOROXINE | 2.18 | 0.07 |  |
| TP53 | SERTRALINE | 1.87 | 0.03 | 16680159 |
| TP53 | CLADRIBINE | 1.74 | 0.03 |  |
| TP53 | PANITUMUMAB | 1.74 | 0.03 | 28514312 |
| TP53 | MECHLORETHAMINE HYDROCHLORIDE | 1.62 | 0.02 |  |
| TP53 | HEXACHLOROPHENE | 1.45 | 0.05 |  |
| TP53 | MAPROTILINE | 1.24 | 0.04 |  |
| TP53 | GRANISETRON | 1.16 | 0.02 |  |
| TP53 | VEMURAFENIB | 1.16 | 0.01 | 26343583|28514312 |
| TP53 | DOXORUBICIN HYDROCHLORIDE | 0.97 | 0.02 |  |
| TP53 | MITOMYCIN | 0.97 | 0.03 | 14514923 |
| TP53 | HYDRALAZINE HYDROCHLORIDE | 0.94 | 0.02 |  |
| TP53 | TRIAMTERENE | 0.87 | 0.01 |  |
| TP53 | PROGESTERONE | 0.87 | 0.03 | 16684279 |
| TP53 | CARBOPLATIN | 0.87 | 0.01 | 25567130|25658463|11595686|26494859|27998224 |
| TP53 | CLEMASTINE | 0.85 | 0.01 |  |
| TP53 | TAMOXIFEN CITRATE | 0.83 | 0.01 |  |
| TP53 | AZACITIDINE | 0.79 | 0.01 |  |
| TP53 | DUVELISIB | 0.77 | 0.01 |  |
| TP53 | ANISINDIONE | 0.76 | 0.01 |  |
| TP53 | TRAMETINIB | 0.74 | 0.01 | 27659046 |
| TP53 | CETUXIMAB | 0.73 | 0.02 | 24957073 |
| TP53 | PEMBROLIZUMAB | 0.73 | 0.02 | 28039262 |
| TP53 | SALMETEROL XINAFOATE | 0.73 | 0.02 |  |
| TP53 | CHLORPROMAZINE | 0.73 | 0.02 |  |
| TP53 | NORTRIPTYLINE | 0.73 | 0.01 |  |
| TP53 | LOPERAMIDE | 0.73 | 0.02 |  |
| TP53 | EPIRUBICIN | 0.64 | 0.02 | 17388661|22903472 |
| TP53 | TRIFLURIDINE | 0.62 | 0.02 | 25700705 |
| TP53 | METHOTREXATE | 0.62 | 0.02 | 17363498 |
| TP53 | CLOMIPRAMINE | 0.62 | 0.02 |  |
| TP53 | BENZALKONIUM CHLORIDE | 0.62 | 0.02 |  |
| TP53 | SERTRALINE HYDROCHLORIDE | 0.62 | 0.02 |  |
| TP53 | ALPELISIB | 0.61 | 0.01 | 27659046 |
| TP53 | FENOFIBRATE | 0.58 | 0.02 | 16680159 |
| TP53 | CISPLATIN | 0.58 | 0.02 | 25376608|25567130|9600935|11595686|25964101|23428903|26086967|11812076|27179933|8678559|14514923|23839309|28652249|18618574|26294215 |
| TP53 | BORTEZOMIB | 0.58 | 0.02 | 28679691 |
| TP53 | PROCHLORPERAZINE | 0.54 | 0.02 |  |
| TP53 | CYCLOPHOSPHAMIDE | 0.54 | 0.02 | 17388661|16243804|26438783 |
| TP53 | AZATHIOPRINE | 0.54 | 0.02 |  |
| TP53 | ABEMACICLIB | 0.53 | 0.01 | 27217383 |
| TP53 | TRIFLUPROMAZINE | 0.51 | 0.02 |  |
| TP53 | TEMOZOLOMIDE | 0.51 | 0.02 | 21730979|24248532 |
| TP53 | METHYLDOPA | 0.49 | 0.01 | 17327663 |
| TP53 | AMOXAPINE | 0.48 | 0.02 |  |
| TP53 | RIBAVIRIN | 0.48 | 0.02 |  |
| TP53 | METHYLENE BLUE | 0.48 | 0.01 |  |
| TP53 | IRINOTECAN | 0.48 | 0.02 | 25567130 |
| TP53 | NICLOSAMIDE | 0.44 | 0.01 |  |
| TP53 | BEVACIZUMAB | 0.44 | 0.01 | 27466356|23670029|17145525 |
| TP53 | NITAZOXANIDE | 0.44 | 0.01 |  |
| TP53 | CHLORAMBUCIL | 0.44 | 0.01 |  |
| TP53 | SIROLIMUS | 0.42 | 0.01 | 26144316|16651424 |
| TP53 | ZINC CHLORIDE | 0.42 | 0.01 | 17327663|29843463 |
| TP53 | OXALIPLATIN | 0.42 | 0.01 | 24957073|21468686 |
| TP53 | CINNARIZINE | 0.4 | 0.01 | 16680159 |
| TP53 | ETHOPROPAZINE HYDROCHLORIDE | 0.4 | 0.01 |  |
| TP53 | PROPYLTHIOURACIL | 0.38 | 0.01 | 7790147 |
| TP53 | MENADIONE | 0.37 | 0.01 |  |
| TP53 | TRICLOCARBAN | 0.36 | 0.01 |  |
| TP53 | OLAPARIB | 0.36 | 0.01 | 22172724 |
| TP53 | MELPHALAN | 0.36 | 0.01 |  |
| TP53 | MERCAPTOPURINE | 0.36 | 0.01 |  |
| TP53 | ERLOTINIB | 0.34 | 0.01 | 27659046 |
| TP53 | PAROXETINE HYDROCHLORIDE | 0.33 | 0.01 |  |
| TP53 | PACLITAXEL | 0.29 | 0.01 | 16459017|24065105 |
| TP53 | DOPAMINE | 0.29 | 0 |  |
| TP53 | APOMORPHINE | 0.28 | 0.01 |  |
| TP53 | CLOFIBRATE | 0.28 | 0.01 | 16680159 |
| TP53 | TAMOXIFEN | 0.26 | 0.01 | 10786679 |
| TP53 | FLUOROURACIL | 0.24 | 0.01 |  |
| TP53 | GEMCITABINE | 0.24 | 0 | 27167172|23520471|21389100|27815358|26228206 |
| TP53 | VENETOCLAX | 0.24 | 0.01 |  |
| TP53 | THIMEROSAL | 0.24 | 0.01 |  |
| TP53 | ENALAPRIL | 0.23 | 0.01 | 16900775 |
| TP53 | DAUNORUBICIN HYDROCHLORIDE | 0.23 | 0.01 |  |
| TP53 | DECITABINE | 0.22 | 0 |  |
| TP53 | WARFARIN | 0.21 | 0.01 |  |
| TP53 | CRIZOTINIB | 0.21 | 0.01 | 25971938|27149990|26438783 |
| TP53 | PROCHLORPERAZINE EDISYLATE | 0.2 | 0.01 |  |
| TP53 | LORLATINIB | 0.18 | 0.01 | 28285684 |
| TP53 | PAZOPANIB | 0.18 | 0.01 | 26646755|25669829 |
| TP53 | PRAMLINTIDE | 0.18 | 0.01 |  |
| TP53 | DABRAFENIB | 0.17 | 0.01 | 27659046 |
| TP53 | ECONAZOLE NITRATE | 0.17 | 0.01 |  |
| TP53 | RALOXIFENE | 0.17 | 0 |  |
| TP53 | HALOPERIDOL | 0.17 | 0.01 | 16476148 |
| TP53 | SULCONAZOLE NITRATE | 0.16 | 0.01 |  |
| TP53 | ETOPOSIDE | 0.15 | 0.01 | 25964101|14514923|24065105 |
| TP53 | DAUNORUBICIN | 0.15 | 0.01 | 16243804 |
| TP53 | CLOTRIMAZOLE | 0.14 | 0 | 16680159 |
| TP53 | ENCORAFENIB | 0.14 | 0 |  |
| TP53 | MITOXANTRONE | 0.14 | 0 |  |
| TP53 | MITOXANTRONE HYDROCHLORIDE | 0.14 | 0 |  |
| TP53 | DOXORUBICIN | 0.13 | 0 | 25658463|21399868|16243804|23165797|26826118|26288684|22698404|17363498|9569050|24065105 |
| TP53 | TRIFLUOPERAZINE | 0.13 | 0 | 12415616 |
| TP53 | CYTARABINE | 0.13 | 0 |  |
| TP53 | PIMOZIDE | 0.13 | 0 |  |
| TP53 | IFOSFAMIDE | 0.13 | 0 | 23165797 |
| TP53 | DASATINIB | 0.13 | 0 | 26855149 |
| TP53 | CAPECITABINE | 0.12 | 0 | 24957073 |
| TP53 | METHIMAZOLE | 0.12 | 0 | 7790147 |
| TP53 | METHYLPREDNISOLONE | 0.11 | 0 | 16684279 |
| TP53 | FLUPHENAZINE | 0.11 | 0 |  |
| TP53 | DOCETAXEL | 0.11 | 0 | 21399868|22425996 |
| TP53 | PERPHENAZINE | 0.11 | 0 |  |
| TP53 | VORINOSTAT | 0.1 | 0 | 26009011|25669829 |
| TP53 | TOPOTECAN | 0.1 | 0 | 26438783 |
| TP53 | RITUXIMAB | 0.06 | 0 | 11895917 |
| ATR | RUCAPARIB | 0.87 | 0.38 |  |
| ATR | CISPLATIN | 0.48 | 0.63 | 12894503 |
| ATR | TEMOZOLOMIDE | 0.44 | 0.28 |  |
| ATR | NIRAPARIB | 0.17 | 0.07 |  |
| ATR | OLAPARIB | 0.13 | 0.17 |  |
| TNFAIP3 | METHOTREXATE | 1.31 | 8.52 | 20921970 |
| TNFAIP3 | USTEKINUMAB | 0.16 | 0.53 | 27564082|23521149 |
